# Supplementary material for: SKP2 attenuates autophagy through Beclin1-ubiquitination and its inhibition reduces MERS-Coronavirus infection
Source: PubMed Central journal article supplement (PMC6920372; doi:10.1038/s41467-019-13659-4), 2019-12-18
Supplement: 41467_2019_13659_MOESM3_ESM.pdf [file 41467_2019_13659_MOESM3_ESM.pdf]

## Reporting Summary

Nature Research wishes to improve the reproducibility of the work that we publish. This form provides structure for consistency and transparency in reporting. For further information on Nature Research policies, see [Authors & Referees](#) and the [Editorial Policy Checklist](#).

### Statistical parameters

When statistical analyses are reported, confirm that the following items are present in the relevant location (e.g. figure legend, table legend, main text, or Methods section).

n/a Confirmed

- The exact sample size ( $n$ ) for each experimental group/condition, given as a discrete number and unit of measurement
- An indication of whether measurements were taken from distinct samples or whether the same sample was measured repeatedly
- The statistical test(s) used AND whether they are one- or two-sided  
*Only common tests should be described solely by name; describe more complex techniques in the Methods section.*
- A description of all covariates tested
- A description of any assumptions or corrections, such as tests of normality and adjustment for multiple comparisons
- A full description of the statistics including central tendency (e.g. means) or other basic estimates (e.g. regression coefficient) AND variation (e.g. standard deviation) or associated estimates of uncertainty (e.g. confidence intervals)
- For null hypothesis testing, the test statistic (e.g.  $F$ ,  $t$ ,  $r$ ) with confidence intervals, effect sizes, degrees of freedom and  $P$  value noted  
*Give  $P$  values as exact values whenever suitable.*
- For Bayesian analysis, information on the choice of priors and Markov chain Monte Carlo settings
- For hierarchical and complex designs, identification of the appropriate level for tests and full reporting of outcomes
- Estimates of effect sizes (e.g. Cohen's  $d$ , Pearson's  $r$ ), indicating how they were calculated
- Clearly defined error bars  
*State explicitly what error bars represent (e.g. SD, SE, CI)*

*Our web collection on [statistics for biologists](#) may be useful.*

### Software and code

Policy information about [availability of computer code](#)

Data collection

No software was used

Data analysis

FACS data were analyzed with FlowJo software version 8.1. Statistical analyses were performed using the SPSS Statistics 18 software (IBM SPSS Statistics, IBM, Chicago, IL, USA).

For manuscripts utilizing custom algorithms or software that are central to the research but not yet described in published literature, software must be made available to editors/reviewers upon request. We strongly encourage code deposition in a community repository (e.g. GitHub). See the Nature Research [guidelines for submitting code & software](#) for further information.

### Data

Policy information about [availability of data](#)

All manuscripts must include a [data availability statement](#). This statement should provide the following information, where applicable:

- Accession codes, unique identifiers, or web links for publicly available datasets
- A list of figures that have associated raw data
- A description of any restrictions on data availability

The source data underlying Figures 1, 2, 4-9, and Supplementary Figures 1-10 are provided as a Source Data file. All other data is available from the authors upon request.

## Field-specific reporting

Please select the best fit for your research. If you are not sure, read the appropriate sections before making your selection.

Life sciences  Behavioural & social sciences  Ecological, evolutionary & environmental sciences

For a reference copy of the document with all sections, see [nature.com/authors/policies/ReportingSummary-flat.pdf](https://www.nature.com/authors/policies/ReportingSummary-flat.pdf)

## Life sciences study design

All studies must disclose on these points even when the disclosure is negative.

|                 |                                                                                                                                                                                                                                                                                                                                                             |
|-----------------|-------------------------------------------------------------------------------------------------------------------------------------------------------------------------------------------------------------------------------------------------------------------------------------------------------------------------------------------------------------|
| Sample size     | The experiments were performed in cell culture, thus typically analysing the average of millions of cells. This type of experiment was repeated at least three times, based on previous experience. When individual cells were analysed for counting autophagosomes and autolysosomes, at least 10 cells were analysed, again based on previous experience. |
| Data exclusions | No data were excluded.                                                                                                                                                                                                                                                                                                                                      |
| Replication     | The cell experiments were performed in at least three biological replicates.                                                                                                                                                                                                                                                                                |
| Randomization   | Not relevant for cell culture experiments                                                                                                                                                                                                                                                                                                                   |
| Blinding        | The counting of autolysosomes and autophagosomes was performed by a colleague blind to the experimental conditions.                                                                                                                                                                                                                                         |

## Reporting for specific materials, systems and methods

### Materials & experimental systems

|                                     |                                                           |
|-------------------------------------|-----------------------------------------------------------|
| n/a                                 | Involvement in the study                                  |
| <input checked="" type="checkbox"/> | <input type="checkbox"/> Unique biological materials      |
| <input type="checkbox"/>            | <input checked="" type="checkbox"/> Antibodies            |
| <input type="checkbox"/>            | <input checked="" type="checkbox"/> Eukaryotic cell lines |
| <input checked="" type="checkbox"/> | <input type="checkbox"/> Palaeontology                    |
| <input checked="" type="checkbox"/> | <input type="checkbox"/> Animals and other organisms      |
| <input checked="" type="checkbox"/> | <input type="checkbox"/> Human research participants      |

### Methods

|                                     |                                                    |
|-------------------------------------|----------------------------------------------------|
| n/a                                 | Involvement in the study                           |
| <input checked="" type="checkbox"/> | <input type="checkbox"/> ChIP-seq                  |
| <input type="checkbox"/>            | <input checked="" type="checkbox"/> Flow cytometry |
| <input checked="" type="checkbox"/> | <input type="checkbox"/> MRI-based neuroimaging    |

## Antibodies

|                 |                                                                                                                                                                                                                                                                                                                                                                                                                                                                                                                                                                                                                                                                                                                                                                                                                                                                                                                                                                                                                                                                                                                                                                                                                                                                                                                                                                                                                                                                                                                                                                                                                                                                                                                                                                                                                                                                                                                                                                                                                                                                                                                                                                                                                             |
|-----------------|-----------------------------------------------------------------------------------------------------------------------------------------------------------------------------------------------------------------------------------------------------------------------------------------------------------------------------------------------------------------------------------------------------------------------------------------------------------------------------------------------------------------------------------------------------------------------------------------------------------------------------------------------------------------------------------------------------------------------------------------------------------------------------------------------------------------------------------------------------------------------------------------------------------------------------------------------------------------------------------------------------------------------------------------------------------------------------------------------------------------------------------------------------------------------------------------------------------------------------------------------------------------------------------------------------------------------------------------------------------------------------------------------------------------------------------------------------------------------------------------------------------------------------------------------------------------------------------------------------------------------------------------------------------------------------------------------------------------------------------------------------------------------------------------------------------------------------------------------------------------------------------------------------------------------------------------------------------------------------------------------------------------------------------------------------------------------------------------------------------------------------------------------------------------------------------------------------------------------------|
| Antibodies used | Actin (1:5000, Santa Cruz Biotechnologies, sc-1616), Beclin-1 (1:1000, Cell Signaling Technology, #3738), K48-linkage Specific Polyubiquitin (D9D5) Rabbit mAb (Cell Signaling #8081, 1:500), PI3K3C (1:1000, Cell Signaling Technology, #4263), LC3-B (1:1000, Cell Signaling Technology, #3868), SQSTM1/p62 (1:1000, Cell Signaling Technology, #5114), VAMP8 (1:1000, Cell Signaling Technology, #13060), Atg14 (1:1000, Cell Signaling Technology, #5504), STX17 (1:1000, Sigma Aldrich, SAB001204), SNAP29 (1:1000, Sigma Aldrich, SAB2107406), PHLPP1 (1:1000, Millipore, 07-1341)                                                                                                                                                                                                                                                                                                                                                                                                                                                                                                                                                                                                                                                                                                                                                                                                                                                                                                                                                                                                                                                                                                                                                                                                                                                                                                                                                                                                                                                                                                                                                                                                                                    |
| Validation      | Actin ( <a href="https://www.scbt.com/scbt/de/product/actin-antibody-i-19">https://www.scbt.com/scbt/de/product/actin-antibody-i-19</a> ), Beclin-1 ( <a href="https://www.cellsignal.com/products/primary-antibodies/beclin-1-antibody/3738">https://www.cellsignal.com/products/primary-antibodies/beclin-1-antibody/3738</a> ), K48-linkage Specific Polyubiquitin (D9D5) Rabbit mAb ( <a href="https://www.cellsignal.com/products/primary-antibodies/k48-linkage-specific-polyubiquitin-d9d5-rabbit-mab/8081">https://www.cellsignal.com/products/primary-antibodies/k48-linkage-specific-polyubiquitin-d9d5-rabbit-mab/8081</a> ), PI3K3C ( <a href="https://www.cellsignal.com/products/primary-antibodies/pi3-kinase-class-iii-d9a5-rabbit-mab/4263">https://www.cellsignal.com/products/primary-antibodies/pi3-kinase-class-iii-d9a5-rabbit-mab/4263</a> ), LC3-B ( <a href="https://www.cellsignal.com/products/primary-antibodies/lc3b-d11-xp-rabbit-mab/3868">https://www.cellsignal.com/products/primary-antibodies/lc3b-d11-xp-rabbit-mab/3868</a> ), SQSTM1/p62 ( <a href="https://www.cellsignal.com/products/primary-antibodies/sqstm1-p62-antibody/5114">https://www.cellsignal.com/products/primary-antibodies/sqstm1-p62-antibody/5114</a> ), VAMP8 ( <a href="https://www.cellsignal.com/products/primary-antibodies/vamp8-antibody/13060">https://www.cellsignal.com/products/primary-antibodies/vamp8-antibody/13060</a> ), Atg14 ( <a href="https://www.cellsignal.com/products/primary-antibodies/atg14-antibody/5504">https://www.cellsignal.com/products/primary-antibodies/atg14-antibody/5504</a> ), STX17 ( <a href="https://www.sigmaaldrich.com/catalog/product/sigma/sab1304559?lang=de&amp;region=DE">https://www.sigmaaldrich.com/catalog/product/sigma/sab1304559?lang=de&amp;region=DE</a> ), SNAP29 ( <a href="https://www.sigmaaldrich.com/catalog/product/sigma/sab1408650?lang=de&amp;region=DE">https://www.sigmaaldrich.com/catalog/product/sigma/sab1408650?lang=de&amp;region=DE</a> ), PHLPP1 ( <a href="http://www.merckmillipore.com/DE/de/product/Anti-PHLPP1-Antibody,MM_NF-07-1341">http://www.merckmillipore.com/DE/de/product/Anti-PHLPP1-Antibody,MM_NF-07-1341</a> ) |

## Eukaryotic cell lines

Policy information about [cell lines](#)

|                     |            |
|---------------------|------------|
| Cell line source(s) | ATCC, DSMZ |
|---------------------|------------|

|                                                                      |                                                                                                     |
|----------------------------------------------------------------------|-----------------------------------------------------------------------------------------------------|
| Authentication                                                       | Upon purchase                                                                                       |
| Mycoplasma contamination                                             | Checked by PCR-based method                                                                         |
| Commonly misidentified lines<br>(See <a href="#">ICLAC</a> register) | Name any commonly misidentified cell lines used in the study and provide a rationale for their use. |

## Flow Cytometry

### Plots

Confirm that:

- The axis labels state the marker and fluorochrome used (e.g. CD4-FITC).
- The axis scales are clearly visible. Include numbers along axes only for bottom left plot of group (a 'group' is an analysis of identical markers).
- All plots are contour plots with outliers or pseudocolor plots.
- A numerical value for number of cells or percentage (with statistics) is provided.

### Methodology

|                           |                                                                                                                                                                                                                                                                                                                                                                                             |
|---------------------------|---------------------------------------------------------------------------------------------------------------------------------------------------------------------------------------------------------------------------------------------------------------------------------------------------------------------------------------------------------------------------------------------|
| Sample preparation        | Cells were washed in PBS and fixed with cold ethanol (70%) for 30 min at 4 °C. After washing with PBS cells were treated with ribonuclease A (100 µg/ml; Sigma Aldrich) and stained with Vybrant DyeCycle Orange (Invitrogen, V35005) as described by the manufacturer's manual. Vybrant® DyeCycle™ Orange stain is excited using both 488 nm and 532 nm laser lines with emission ~570 nm. |
| Instrument                | FACSCalibur (BD Biosciences).                                                                                                                                                                                                                                                                                                                                                               |
| Software                  | FlowJo software (Tree Star).                                                                                                                                                                                                                                                                                                                                                                |
| Cell population abundance | no sorting                                                                                                                                                                                                                                                                                                                                                                                  |
| Gating strategy           | Gating corresponding to G1 or G2/M is indicated in the plots                                                                                                                                                                                                                                                                                                                                |

- Tick this box to confirm that a figure exemplifying the gating strategy is provided in the Supplementary Information.
